# Supplementary material for: A layered CoSeO3 pre-catalyst for electrocatalytic water oxidation
Source: Royal Society of Chemistry journal article supplement (doi:10.1039/d3dt01497e), 2023-01-01
Supplement: d3dt01497e1.pdf [file d3dt01497e1.pdf]

Electronic Supplementary Material (ESI) for Dalton Transactions.  
This journal is © The Royal Society of Chemistry 2023

## Electronic Supporting Information

### A layered $\text{CoSeO}_3$ pre-catalyst for electrocatalytic water oxidation

Ting Wang,<sup>a</sup> Shujiao Yang,<sup>a</sup> Haoquan Zheng,<sup>a</sup> Wei Zhang,<sup>\*a</sup> and Rui Cao<sup>\*a</sup>

Key Laboratory of Applied Surface and Colloid Chemistry, Ministry of Education, School of Chemistry and  
Chemical Engineering, Shaanxi Normal University, Xi'an 710119, China.

\*Corresponding authors. Emails: zw@snnu.edu.cn (W.Z.); ruicao@snnu.edu.cn (R.C.).

## General materials

K<sub>2</sub>CO<sub>3</sub> (99.0%, Energy Chemical), CoCl<sub>3</sub>·6H<sub>2</sub>O (99.0%, Energy Chemical), Co(SO<sub>4</sub>)·7H<sub>2</sub>O (99.0%, Energy Chemical), Co(OAc)<sub>2</sub>·4H<sub>2</sub>O (99.0%, Energy Chemical), SeO<sub>2</sub> (99.0%, Energy Chemical), KOH (98.0%, Energy Chemical), and Nafion (5 wt%, DuPont) were acquired from commercial supplies and used without further purification. Milli-Q water of 18 MΩ cm was used in all experiments unless otherwise stated.

The dependence of the reaction rate on the proton activity was derived based on the following Equation (S1):

$$\rho_{\text{RHE}} = \left( \frac{\partial E}{\partial \text{pH}} \right)_j = - \left( \frac{\partial E}{\partial \log(j)} \right)_{\text{pH}} \left( \frac{\partial \log(j)}{\partial \text{pH}} \right)_E$$

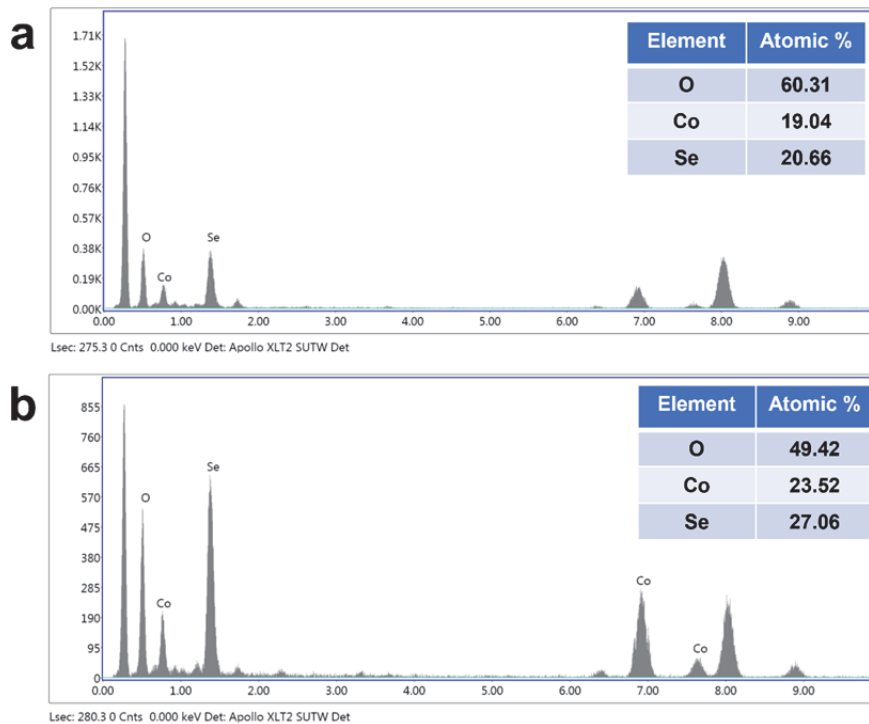

**Figure S1.** EDX spectra of (a)  $\text{CoSeO}_3$  and (b)  $\text{CoSeO}_3 \cdot 2\text{H}_2\text{O}$ .

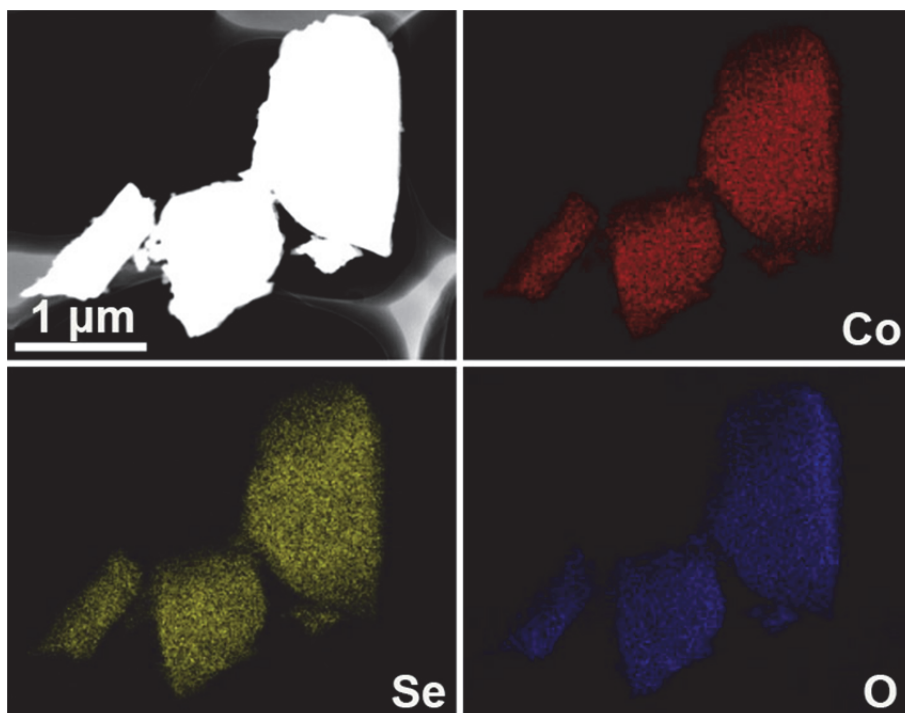

**Figure S2.** EDX elemental mapping images of Co, Se, and O for  $\text{CoSeO}_3$ .

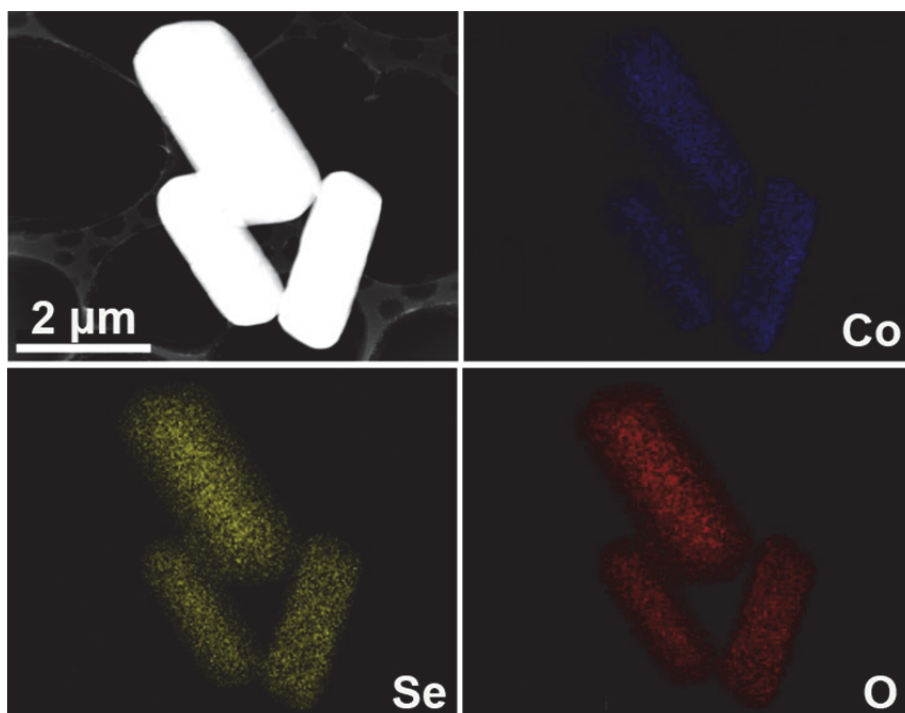

**Figure S3.** EDX elemental mapping images of Co, Se, and O for  $\text{CoSeO}_3 \cdot 2\text{H}_2\text{O}$ .

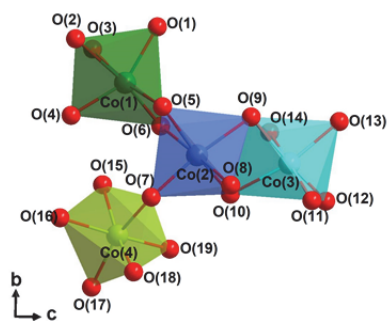

|                    |                     | Atom        | Distance (Å) |
|--------------------|---------------------|-------------|--------------|
| CoSeO <sub>3</sub> | Co(1)O <sub>6</sub> | Co(1)-O(1)  | 2.0836       |
|                    |                     | Co(1)-O(2)  | 2.3439       |
|                    |                     | Co(1)-O(3)  | 2.2587       |
|                    |                     | Co(1)-O(4)  | 2.0399       |
|                    |                     | Co(1)-O(5)  | 2.0366       |
|                    |                     | Co(1)-O(6)  | 2.0488       |
|                    | Co(2)O <sub>6</sub> | Co(2)-O(5)  | 2.0448       |
|                    |                     | Co(2)-O(6)  | 2.2568       |
|                    |                     | Co(2)-O(7)  | 2.0183       |
|                    |                     | Co(2)-O(8)  | 2.2351       |
|                    |                     | Co(2)-O(9)  | 2.1320       |
|                    |                     | Co(2)-O(10) | 2.1077       |
|                    | Co(3)O <sub>6</sub> | Co(3)-O(9)  | 2.1415       |
|                    |                     | Co(3)-O(10) | 2.0999       |
|                    |                     | Co(3)-O(11) | 2.1320       |
|                    |                     | Co(3)-O(12) | 2.0528       |
|                    |                     | Co(3)-O(13) | 2.0614       |
|                    |                     | Co(3)-O(14) | 2.1615       |
|                    | Co(4)O <sub>6</sub> | Co(4)-O(7)  | 2.0706       |
| Co(4)-O(15)        |                     | 2.0422      |              |
| Co(4)-O(16)        |                     | 2.0748      |              |
| Co(4)-O(17)        |                     | 2.0383      |              |
| Co(4)-O(18)        |                     | 2.2597      |              |
| Co(4)-O(19)        |                     | 2.1208      |              |

**Figure S4.** Crystal structure of Co-polyhedrons and bond lengths in CoSeO<sub>3</sub>.

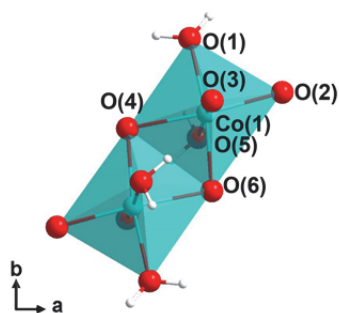

|                                          |            | Distance (Å) |
|------------------------------------------|------------|--------------|
| <b>CoSeO<sub>3</sub>·2H<sub>2</sub>O</b> | Co(1)-O(1) | 2.0279       |
|                                          | Co(1)-O(2) | 2.0589       |
|                                          | Co(1)-O(3) | 2.1484       |
|                                          | Co(1)-O(4) | 2.1051       |
|                                          | Co(1)-O(5) | 2.1577       |
|                                          | Co(1)-O(6) | 2.0610       |

**Figure S5.** Crystal structure of Co-polyhedrons and bond lengths in CoSeO<sub>3</sub>·2H<sub>2</sub>O.

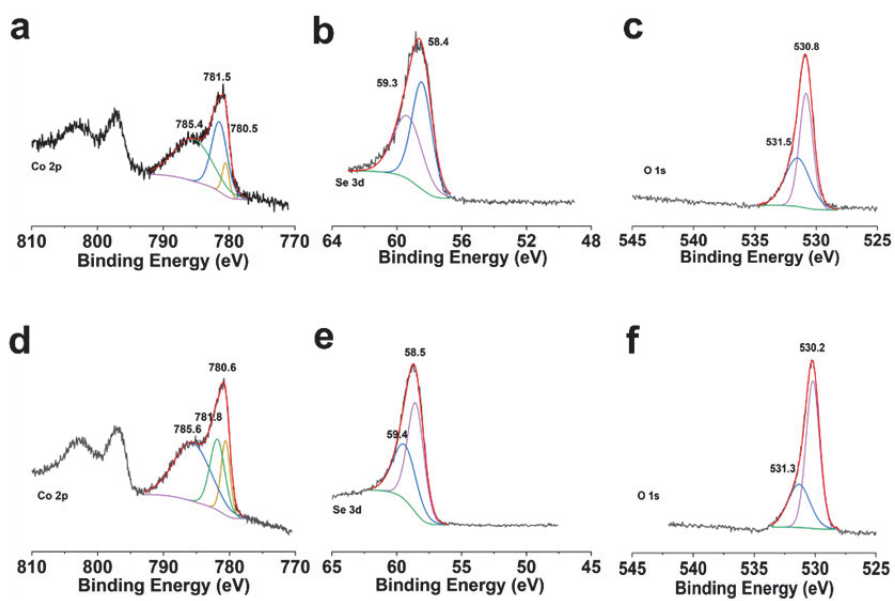

**Figure S6.** XPS spectra of (a-c) CoSeO<sub>3</sub> and (d-f) CoSeO<sub>3</sub>·2H<sub>2</sub>O in the Co 2p, Se 3d, and O 1s regions.



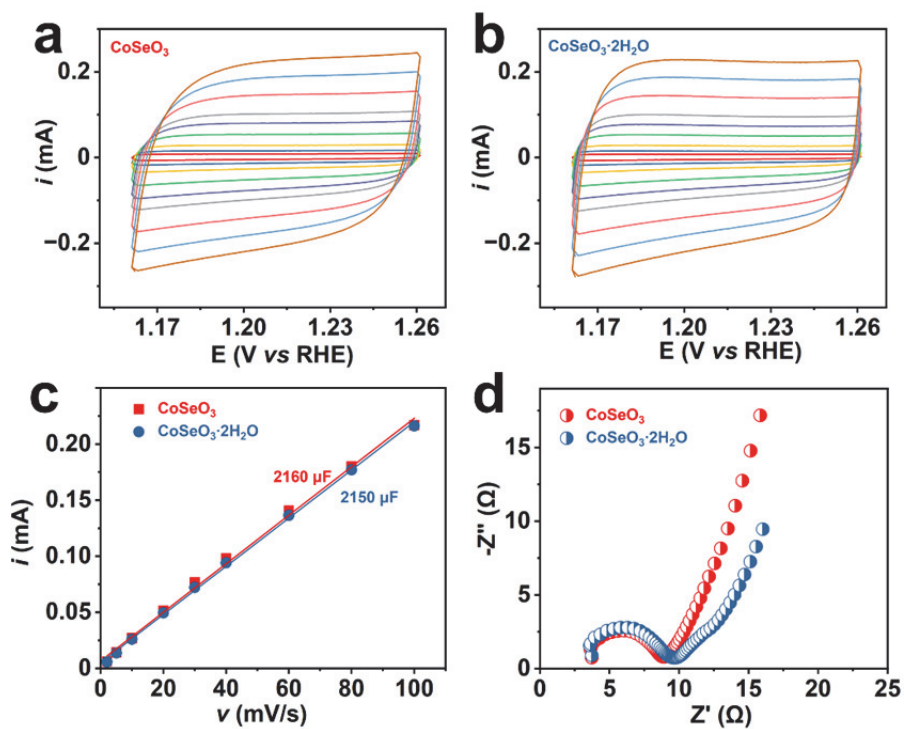

**Figure S7.** The charging-discharging currents of (a)  $\text{CoSeO}_3$  and (b)  $\text{CoSeO}_3 \cdot 2\text{H}_2\text{O}$  collected in the non-Faradaic potential range with scan rates of 2, 5, 10, 20, 30, 40, 60, 80, and 100  $\text{mV s}^{-1}$ . (c) The charging currents plotted against the scan rates, the slope of which represents the electrochemical surface capacitances. (d) Nyquist plots of  $\text{CoSeO}_3$  and  $\text{CoSeO}_3 \cdot 2\text{H}_2\text{O}$  at OCP.

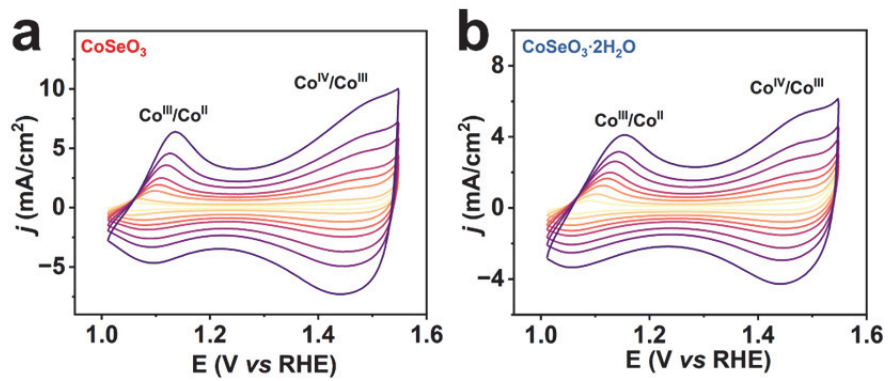

**Figure S8.** CV curves at different scan rates (2, 5, 10, 15, 20, 30, 40, and 60 mV s<sup>-1</sup>) of (a)  $\text{CoSeO}_3$  and (b)  $\text{CoSeO}_3 \cdot 2\text{H}_2\text{O}$ .

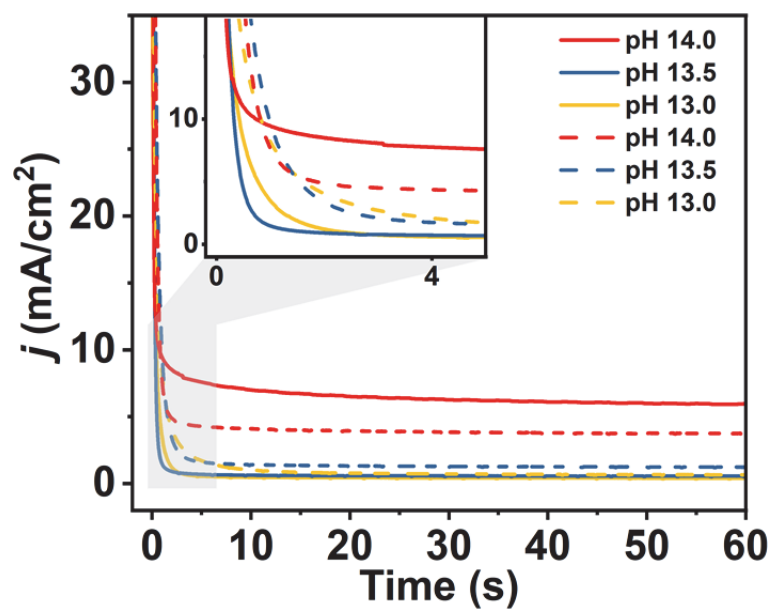

**Figure S9.** Chronoamperograms of CoSeO<sub>3</sub> and CoSeO<sub>3</sub>·2H<sub>2</sub>O at different pH values (14.0, 13.5, and 13.0) at a constant bias of 0.560 V (*vs* Ag/AgCl). The Solid lines represent CoSeO<sub>3</sub> and the dashed lines represent CoSeO<sub>3</sub>·2H<sub>2</sub>O.

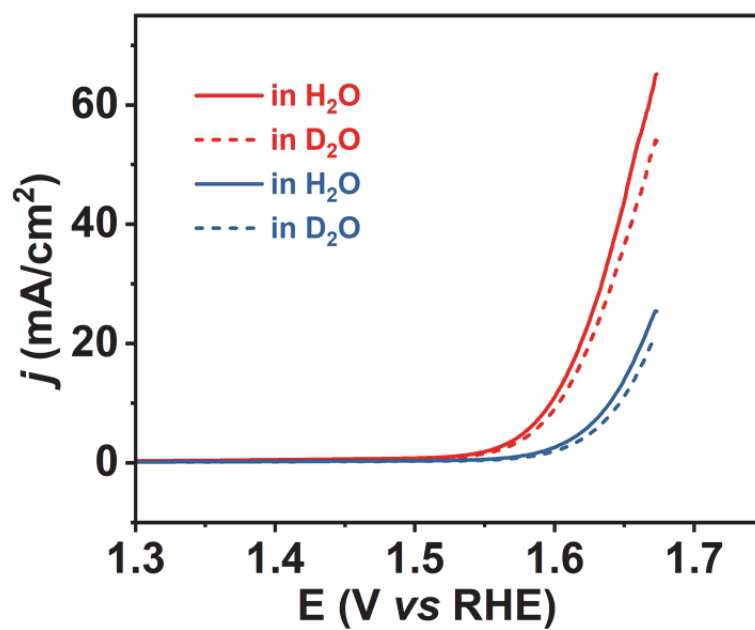

**Figure S10.** The LSV curves of CoSeO<sub>3</sub> (red) and CoSeO<sub>3</sub>·2H<sub>2</sub>O (blue) in H<sub>2</sub>O and D<sub>2</sub>O solutions.

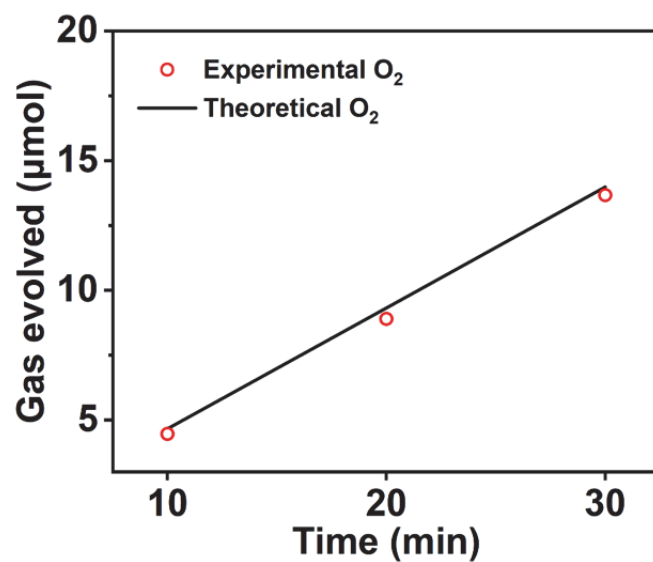

**Figure S11.** Experimental (from gas chromatography analysis) and theoretical (from transferred charge) amount of O<sub>2</sub> evolved by the chronopotentiometry with CoSeO<sub>3</sub> catalyst for OER at 3 mA. The faradaic efficiency is > 95%.

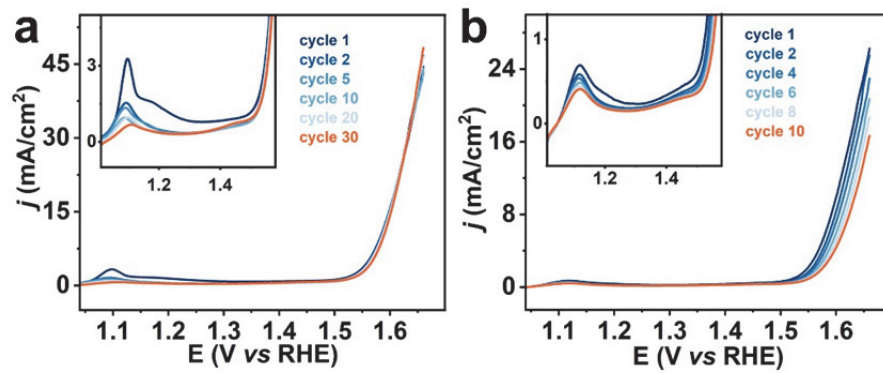

**Figure S12.** LSV curves for (a)  $\text{CoSeO}_3$  and (b)  $\text{CoSeO}_3 \cdot 2\text{H}_2\text{O}$  after water oxidation activation.

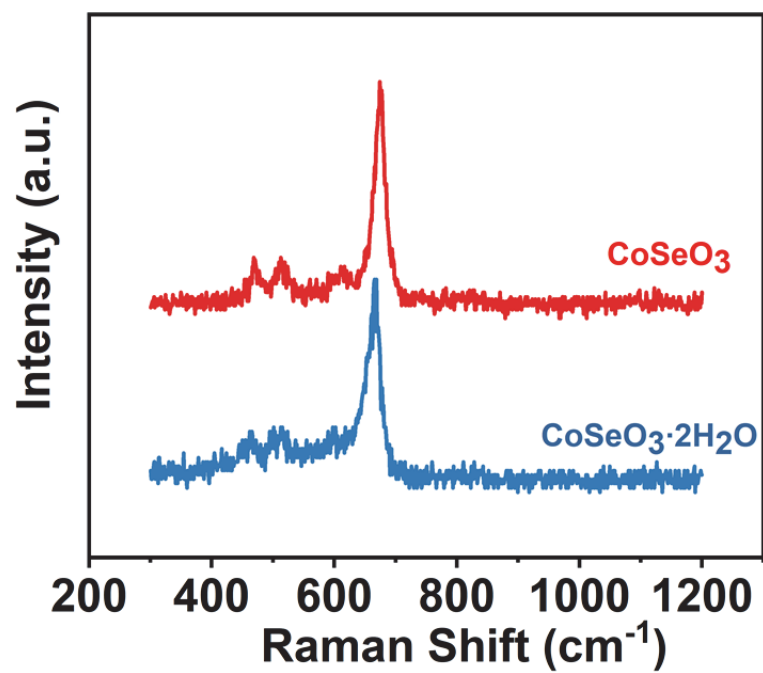

**Figure S13.** Raman spectra of CoSeO<sub>3</sub> and CoSeO<sub>3</sub>·2H<sub>2</sub>O acquired after OER.

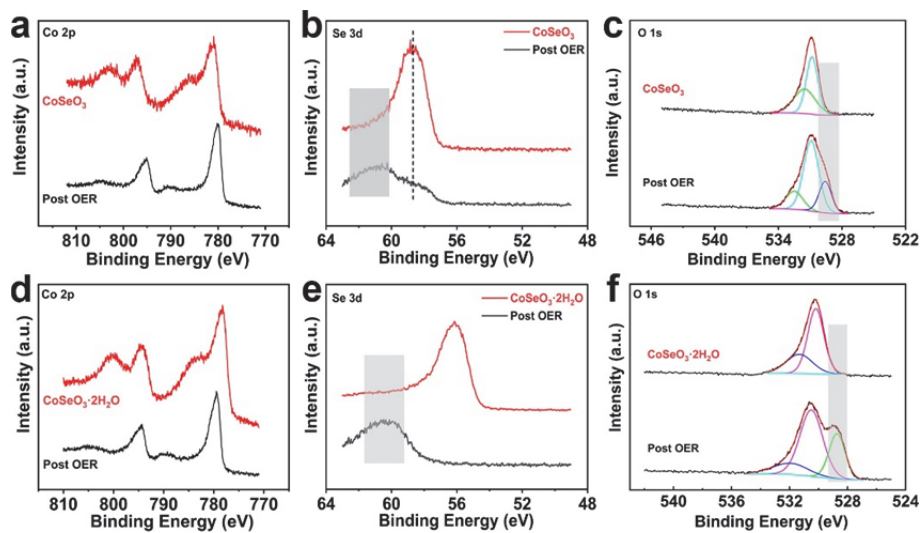

**Figure S14.** XPS spectra of (a-c) CoSeO<sub>3</sub> and (d-f) CoSeO<sub>3</sub>·2H<sub>2</sub>O of in the Co 2p, Se 3d, and O 1s regions acquired before and after OER.



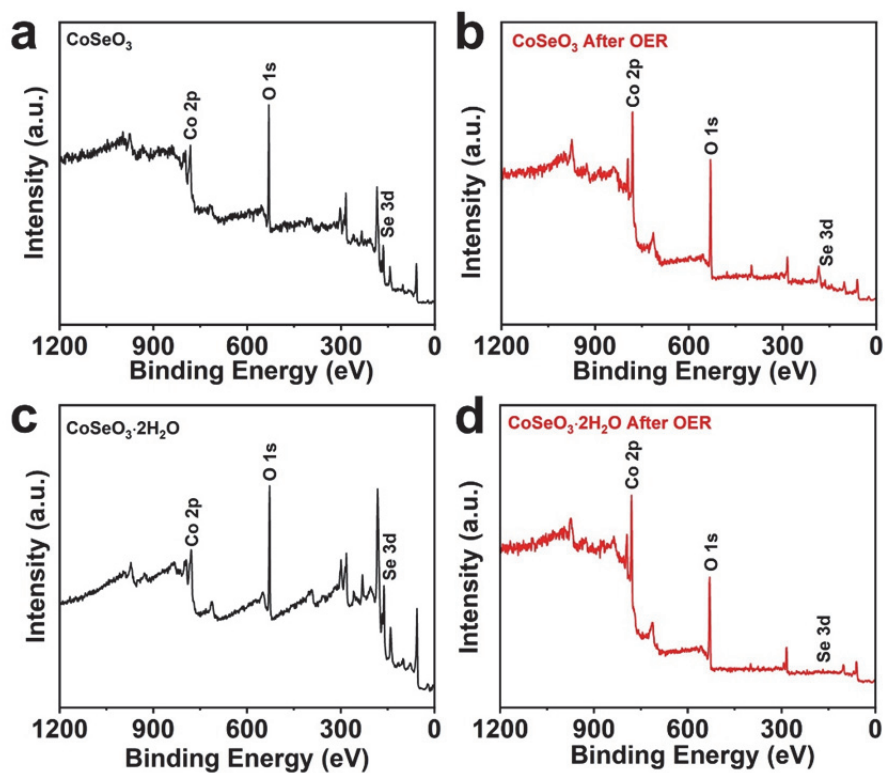

**Figure S15.** XPS survey scan spectra of (a, b)  $\text{CoSeO}_3$  and (c, d)  $\text{CoSeO}_3 \cdot 2\text{H}_2\text{O}$  before and after OER electrolysis.

**Table S1.** The contents of Se in  $\text{CoSeO}_3$  and  $\text{CoSeO}_3 \cdot 2\text{H}_2\text{O}$  samples before and after OER determined by XPS analysis.

|                                            | Se 3d/At% (Before OER) | Se 3d/At% (After OER) |
|--------------------------------------------|------------------------|-----------------------|
| $\text{CoSeO}_3$                           | 18.02                  | 6.26                  |
| $\text{CoSeO}_3 \cdot 2\text{H}_2\text{O}$ | 24.97                  | 1.33                  |

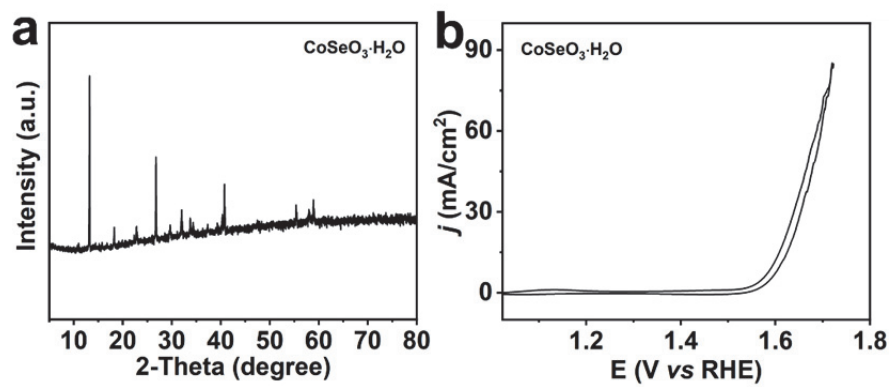

**Figure S16.** (a) XRD pattern of  $\text{CoSeO}_3 \cdot \text{H}_2\text{O}$ . (b) CV curve of  $\text{CoSeO}_3 \cdot \text{H}_2\text{O}$  in 1 M KOH solution.

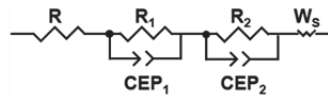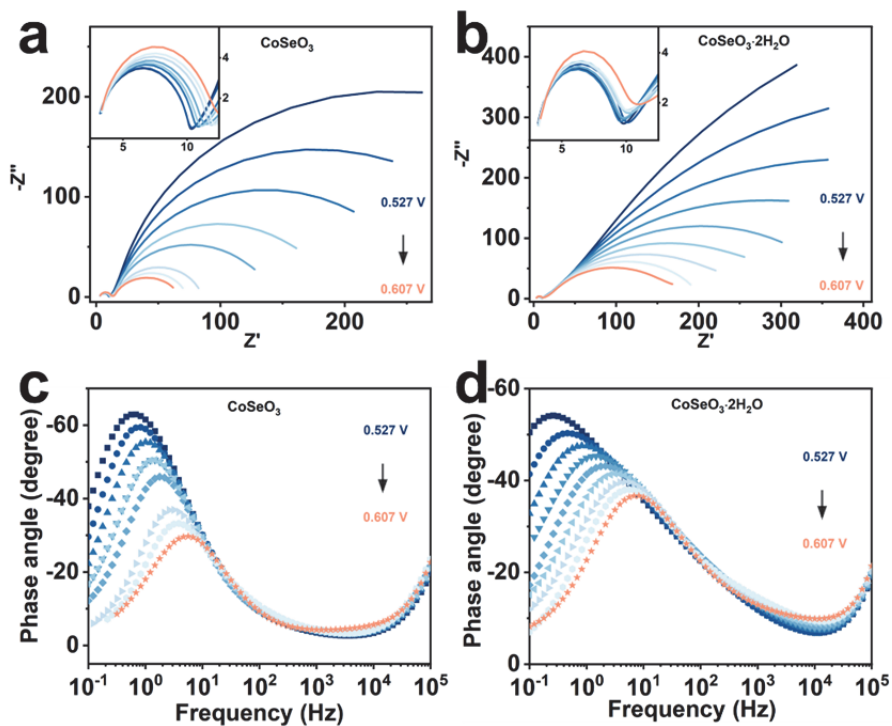

**Figure S17.** Nyquist plots of (a)  $\text{CoSeO}_3$  and (b)  $\text{CoSeO}_3 \cdot 2\text{H}_2\text{O}$  acquired at different potentials (0.527, 0.537, 0.547, 0.557, 0.567, 0.577, 0.587, 0.597, and 0.607 V (vs Ag/AgCl)) in 1.0 M KOH. (c, d) The corresponding Bode plot showing phase data. Data is fitted to a modified Randle's circuit.

**Table S2.** Comparison of the electrocatalytic OER performance for CoSeO<sub>3</sub> and other reported MSeO<sub>x</sub>-based electrocatalysts.

| Catalysts                                         | Substrates | Electrolyte | Overpotential<br>(@10 mA/cm <sup>-2</sup> ) | Reference                                                                  |
|---------------------------------------------------|------------|-------------|---------------------------------------------|----------------------------------------------------------------------------|
| CoSeO <sub>3</sub>                                | GC         | 1.0 M KOH   | 350 mV                                      | This work                                                                  |
| CoSeO <sub>3</sub> ·2H <sub>2</sub> O             | GC         | 1.0 M KOH   | 400 mV                                      | This work                                                                  |
| CoSe <sub>2</sub>                                 | CC         | 1.0 M KOH   | 432 mV                                      | <i>J. Phys. Chem. C</i> , 2020,<br><b>124</b> , 9673–9684.                 |
| MOF CoSeO <sub>3</sub>                            | NF         | 1.0 M KOH   | 290 mV<br>(@50 mA/cm <sup>-2</sup> )        | <i>Inorg. Chem.</i> , 2020, <b>59</b> ,<br>3817–3827.                      |
| CoSeO <sub>3</sub> ·H <sub>2</sub> O              | FTO        | 1.0 M KOH   | 310 mV                                      | <i>Energy Environ. Sci.</i> ,<br>2020, <b>13</b> , 3607–3619.              |
| Mn <sub>3</sub> O <sub>4</sub> /CoSe <sub>2</sub> | GC         | 0.1 M KOH   | 450 mV                                      | <i>J. Am. Chem. Soc.</i> ,<br>2012, <b>134</b> , 2930–2933.                |
| PdO@CoSe <sub>2</sub>                             | GC         | 1.0 M KOH   | 260 mV<br>(@20 mA/cm <sup>-2</sup> )        | <i>RSC Adv.</i> , 2023, <b>13</b> ,<br>743–755.                            |
| CoSe <sub>2</sub> /N-Graphene                     | CF         | 0.1 M KOH   | 366 mV                                      | <i>ACS Nano</i> , 2014, <b>8</b> ,<br>3970–3978.                           |
| CoSe <sub>2</sub> -CeO <sub>2</sub>               | GC         | 0.1 M KOH   | 288 mV                                      | <i>Small</i> , 2015, <b>11</b> , 182–<br>188.                              |
| FeSe <sub>2</sub> /CoSe <sub>2</sub> @SC          | GC         | 1.0 M KOH   | 407 mV                                      | <i>Electrochim. Acta</i> , 2023,<br><b>445</b> , 142049.                   |
| Ni <sub>3</sub> Se <sub>4</sub> /UCL-3            | GC         | 1.0 M KOH   | 350 mV                                      | <i>Chem. Eng. J.</i> , 2022,<br><b>430</b> , 132720.                       |
| FeSe/NC-PoFeSe                                    | GC         | 0.1 M KOH   | 330 mV                                      | <i>ACS Appl. Mater.<br/>Interfaces</i> , 2018, <b>10</b> ,<br>32133–32141. |
| MnSe                                              | GC         | 1.0 M KOH   | 310 mV                                      | <i>J. Mater. Chem. A</i> ,<br>2022, <b>10</b> , 6772–6784.                 |
